# Supplementary material
Source: PubMed Central journal article supplement (PMC9937721)
Supplement: mmc1.pdf [file mmc1.pdf]

Supplementary Figure 1. Information component values of drug-induced liver injury with ritonavir-boosted nirmatrelvir vs other COVID drugs used under emergency use authorization. Sensitivity analysis was conducted by restricting the data to those reported by healthcare professionals only. AEs, adverse events; DILI, drug-induced liver injury.

|              |              |               |                    |
|--------------|--------------|---------------|--------------------|
| DILI of      | Total AEs of | DILI of other | Total AEs of other |
| Nirmatrelvir | Nirmatrelvir | COVID drugs   | COVID drugs        |

**Information component (95% CI)**

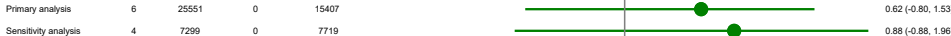

-2

0

2
